# Supplementary material
Source: HighWire-hosted journal article supplement (https://bmjopenquality.bmj.com/highwire/filestream/136031/field_highwire_adjunct_files/1/ds5437.docx)
Supplement: ds5437.docx [file ds5437.docx]

**Results**
